# Supplementary material
Source: PubMed Central journal article supplement (PMC4256431)
Supplement: NIHMS61329-supplement-01.pdf [file NIHMS61329-supplement-01.pdf]

**Annexin A1 mediates hydrogen sulfide properties in the control of  
inflammation**

**Vincenzo Brancaleone, Roderick J. Flower, Giuseppe Cirino and Mauro Perretti**

Department of Science, University of Basilicata, Potenza, Italy (V.B.); Department of Pharmacy, University of Naples, Naples, Italy (G.C.); William Harvey Research Institute, Barts and The London School of Medicine and Dentistry, Queen Mary University of London, London, UK (V.B., R.J.F., M.P.).

**JPET/2014/217034 - Supplemental material**

**Supplemental material**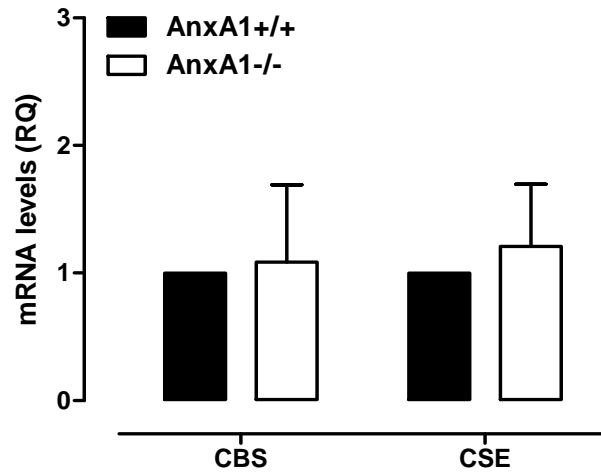

**Supplemental figure 1.** Expression of mRNA levels in liver harvested from AnxA1+/+ and AnxA1-/- mice. mRNA levels expressed as relative quantity (RQ). No statistical difference were assessed by using Student's t test (\* $p < 0.05$ , \*\* $p < 0.01$ ; \*vs AnxA1+/+;  $n = 6$ ).

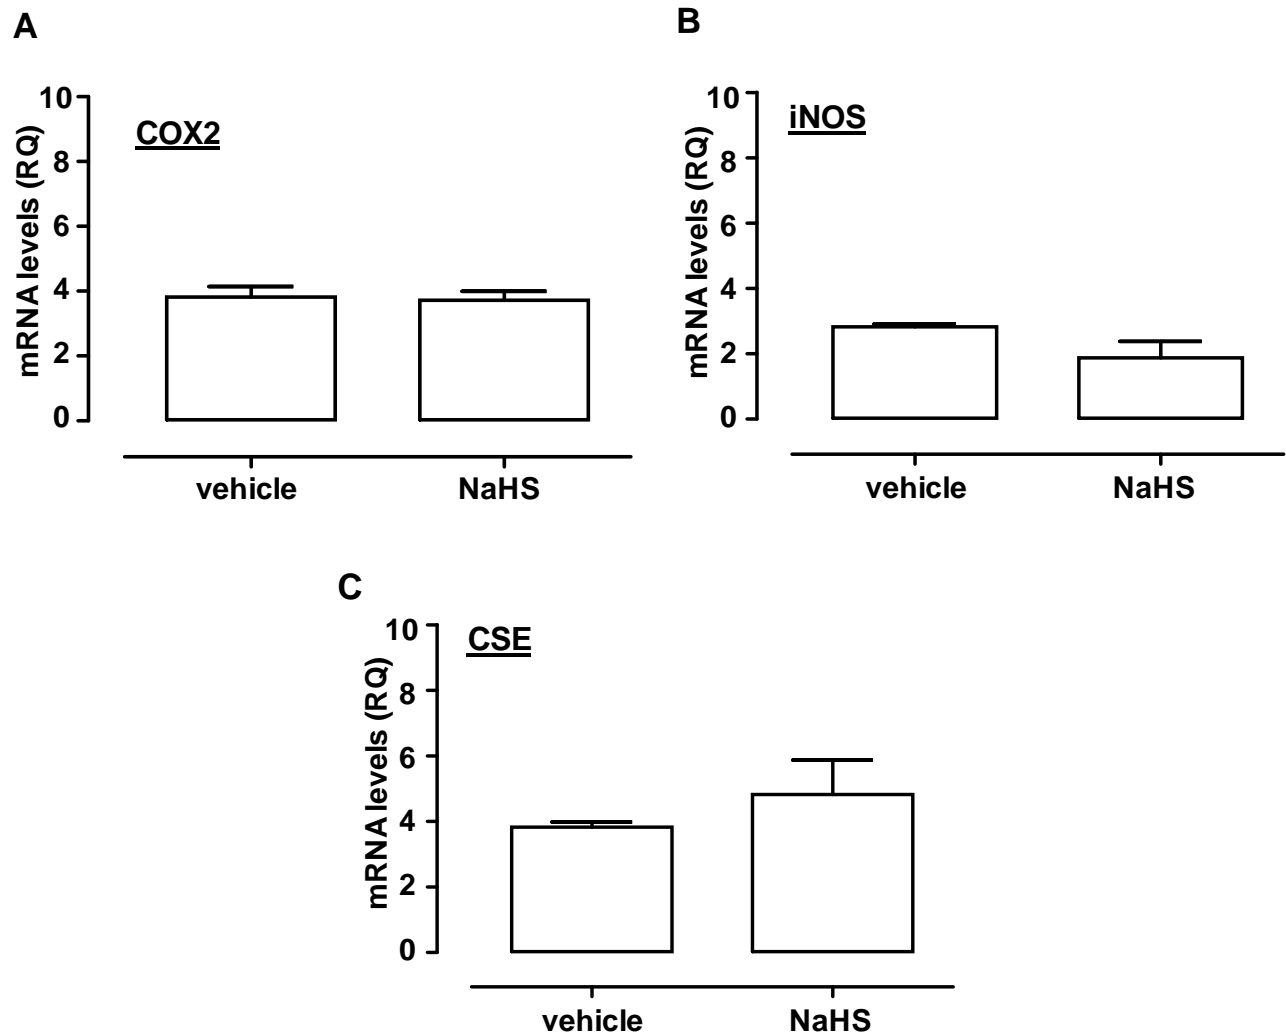

**Supplemental figure 2.** Expression of COX2 (A), iNOS (B) and CSE (C) mRNA levels in unstimulated AnxA1<sup>+/+</sup> BMDMs treated with vehicle or NaHS alone (100 μM, 1h). NaHS does not affect basal levels of gene products for COX2, iNOS and CSE. Statistical analysis was made by using Student's t-test (n=3).

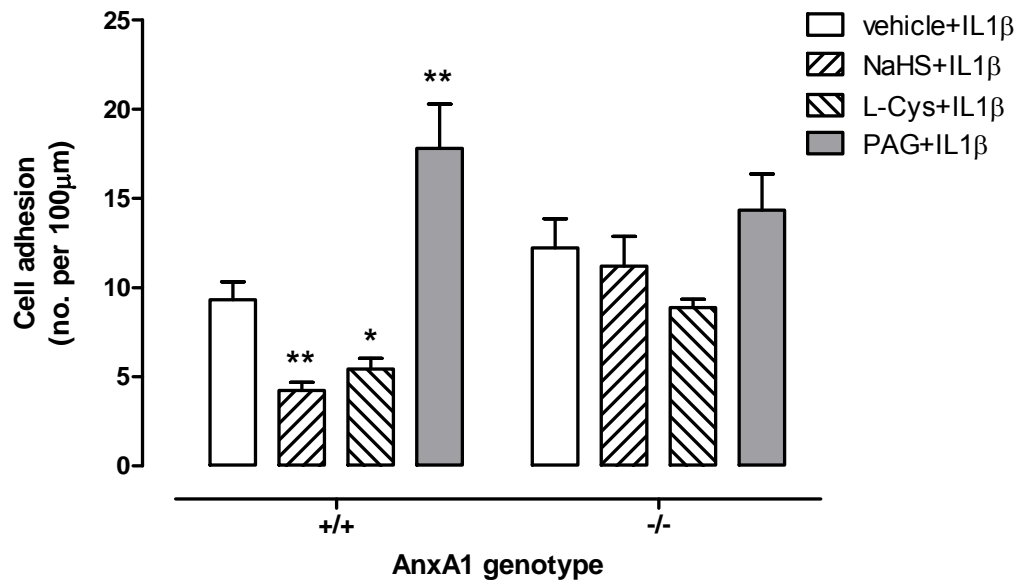

**Supplemental figure 3.** Intravital microscopy analysis of postcapillary venules in AnxA1<sup>+/+</sup> or AnxA1<sup>-/-</sup> mice showing adherent leukocytes. Mice were pre-treated with vehicle, NaHS (100µmol/kg s.c.) or L-cysteine (L-cys, 1000µmol/kg s.c.) 1h before stimulation with IL1β (10ng/mouse i.p., 2h) and number of adherent leukocytes were analysed (expressed as no. cells per 50x100µm<sup>2</sup>). D,L-propargylglycine (PAG, 10mg/kg i.p.) was given 30 minutes before IL1β injection. Statistical analysis was made by using two-way ANOVA (\*p<0.05, \*\*p<0.01; \* vs vehicle; n=6)

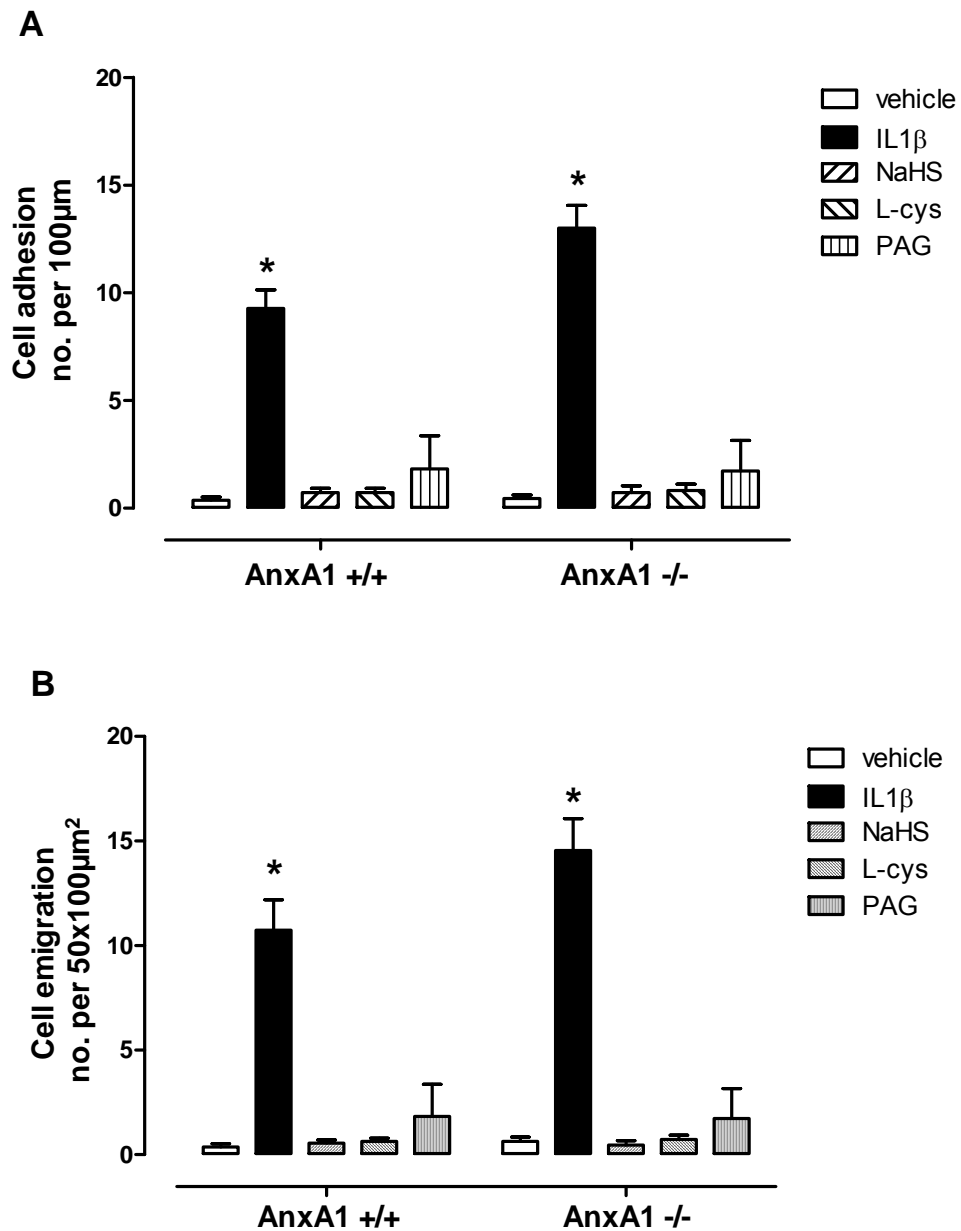

**Supplemental figure 4.** Intravital microscopy analysis of AnxA1<sup>+/+</sup> and AnxA1<sup>-/-</sup> mouse mesenteric microcirculation in non-inflamed condition. Administration of NaHS (100µmol/kg s.c.), L-cysteine (L-cys, 1000µmol/kg s.c.) or D,L-propargylglycine (PAG, 10mg/kg, i.p.) did not affect cell trafficking baseline expressed as cell adhesion (A) or emigration (B) in AnxA1<sup>+/+</sup> or AnxA1<sup>-/-</sup> mice. Statistical analysis was made by using two-way ANOVA (\*p<0.05 vs vehicle; n=6).

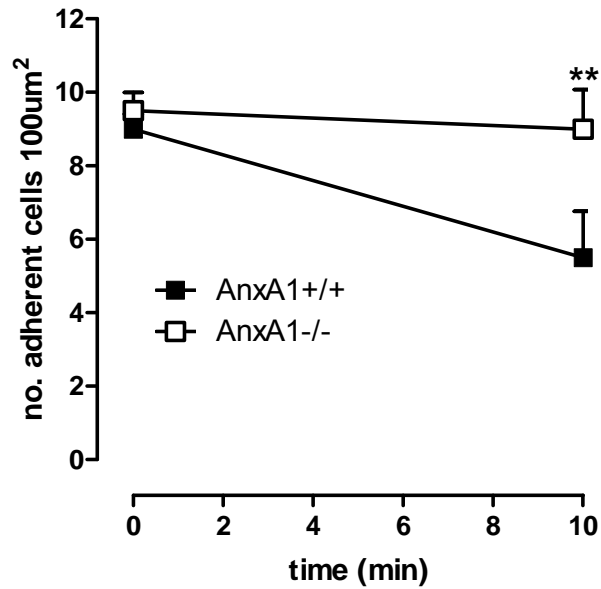

**Supplemental figure 5.** Intravital microscopy analysis of AnxA1<sup>+/+</sup> and AnxA1<sup>-/-</sup> mouse mesenteric microcirculation inflamed by IL1 $\beta$  injection (10ng/mouse i.p., 2h). Administration of NaHS (1 $\mu\text{M}$ , 10 minutes superfusion on the postcapillary venule selected) induced detachment of adherent leukocytes in AnxA1<sup>+/+</sup>, but not in AnxA1<sup>-/-</sup>, mice. Statistical analysis was made by using Student's t-test (\*\*p<0.01, n=6).

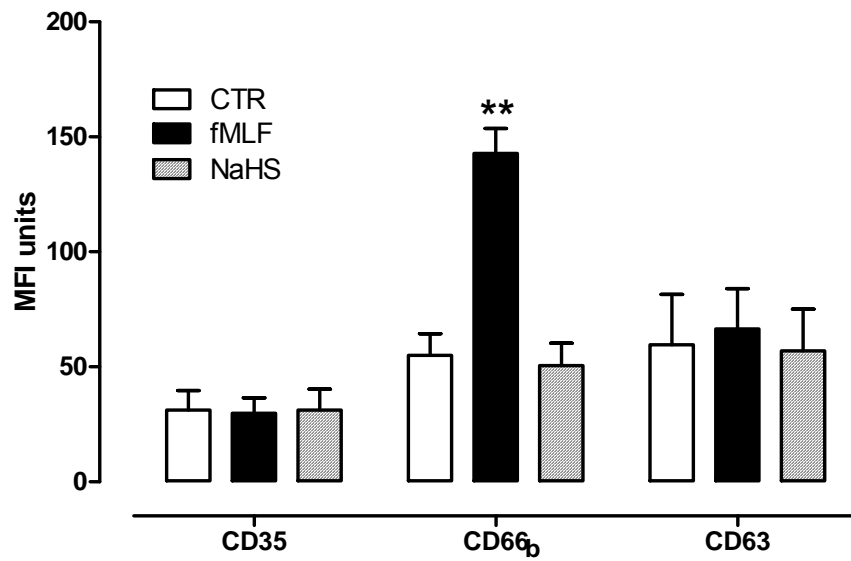

**Supplemental figure 6.** Modulation of CD35, CD66b and CD63 surface expression by H<sub>2</sub>S. The graph shows CDs surface expression in human PMN pretreated with vehicle (CTR) or NaHS (100μM). fMLP (0.1μM, 30 minutes) was used as positive control for PMN activation/degranulation. As displayed, NaHS does not affect PMN surface expression of CD35, CD66b or CD63, markers for secretory vesicles, specific granules and azurophilic granules, respectively. Statistical analysis was made by using one-way ANOVA (\*\*p<0.01 vs CTR; n=4).
